# Supplementary material for: A prefrontal-bed nucleus of the stria terminalis circuit limits fear to uncertain threat
Source: eLife journal article supplement (doi:10.7554/elife.60812), 2020-12-15
Supplement: figures [file elife-60812-figures-v2.pdf]

---

## Figures and figure supplements

A prefrontal-bed nucleus of the stria terminalis circuit limits fear to uncertain threat

**Lucas R Glover *et al***

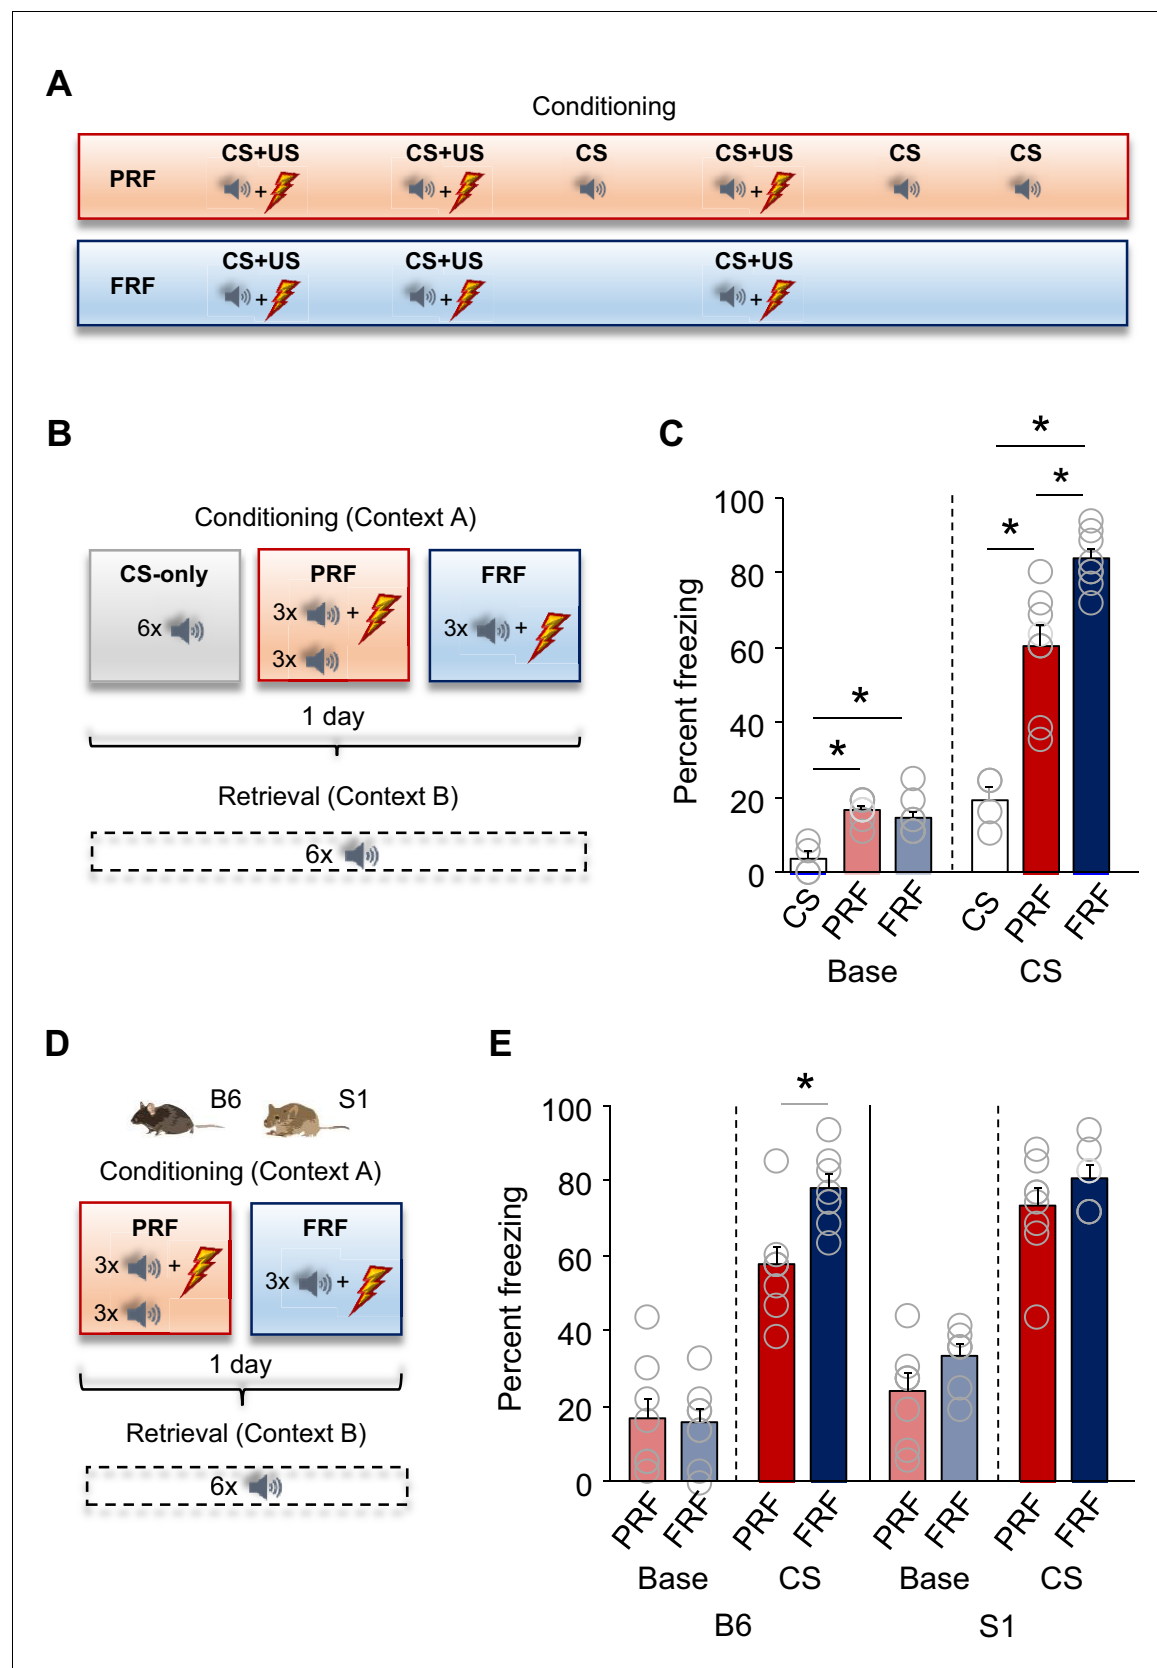

**Figure 1.** Lower freezing during retrieval of partially reinforced fear; effects of genetic strain. (A) Schematic depiction of experimental procedure for assessing, in B6 mice, PRF and FRF, along with CS-only controls. (B) Schematic depiction of experimental procedure for assessing, in B6 mice, PRF and FRF. (C) Bar graph showing percent freezing for PRF and FRF groups in Context A and Context B. (D) Schematic depiction of experimental procedure for assessing, in B6 mice, PRF and FRF. (E) Bar graph showing percent freezing for PRF and FRF groups in Context A and Context B for B6 mice. *Figure 1 continued on next page*

*Figure 1 continued*

FRF retrieval in a novel context (context B) and the conditioning context (context A) (C) Lower CS-related freezing during retrieval in PRF mice than in FRF mice. Higher baseline and CS-related freezing in PRF and FRF mice relative to CS-only controls (n = 4–8 mice per group). (D) Schematic depiction of experimental procedure for assessing PRF and FRF retrieval in the B6 and S1 genetic strains. (E) Lower CS-related freezing during retrieval in PRF than in FRF in B6, not S1, mice (n = 7–8 mice per group/strain). Data are means  $\pm$  SEM. \* $p < 0.05$ .

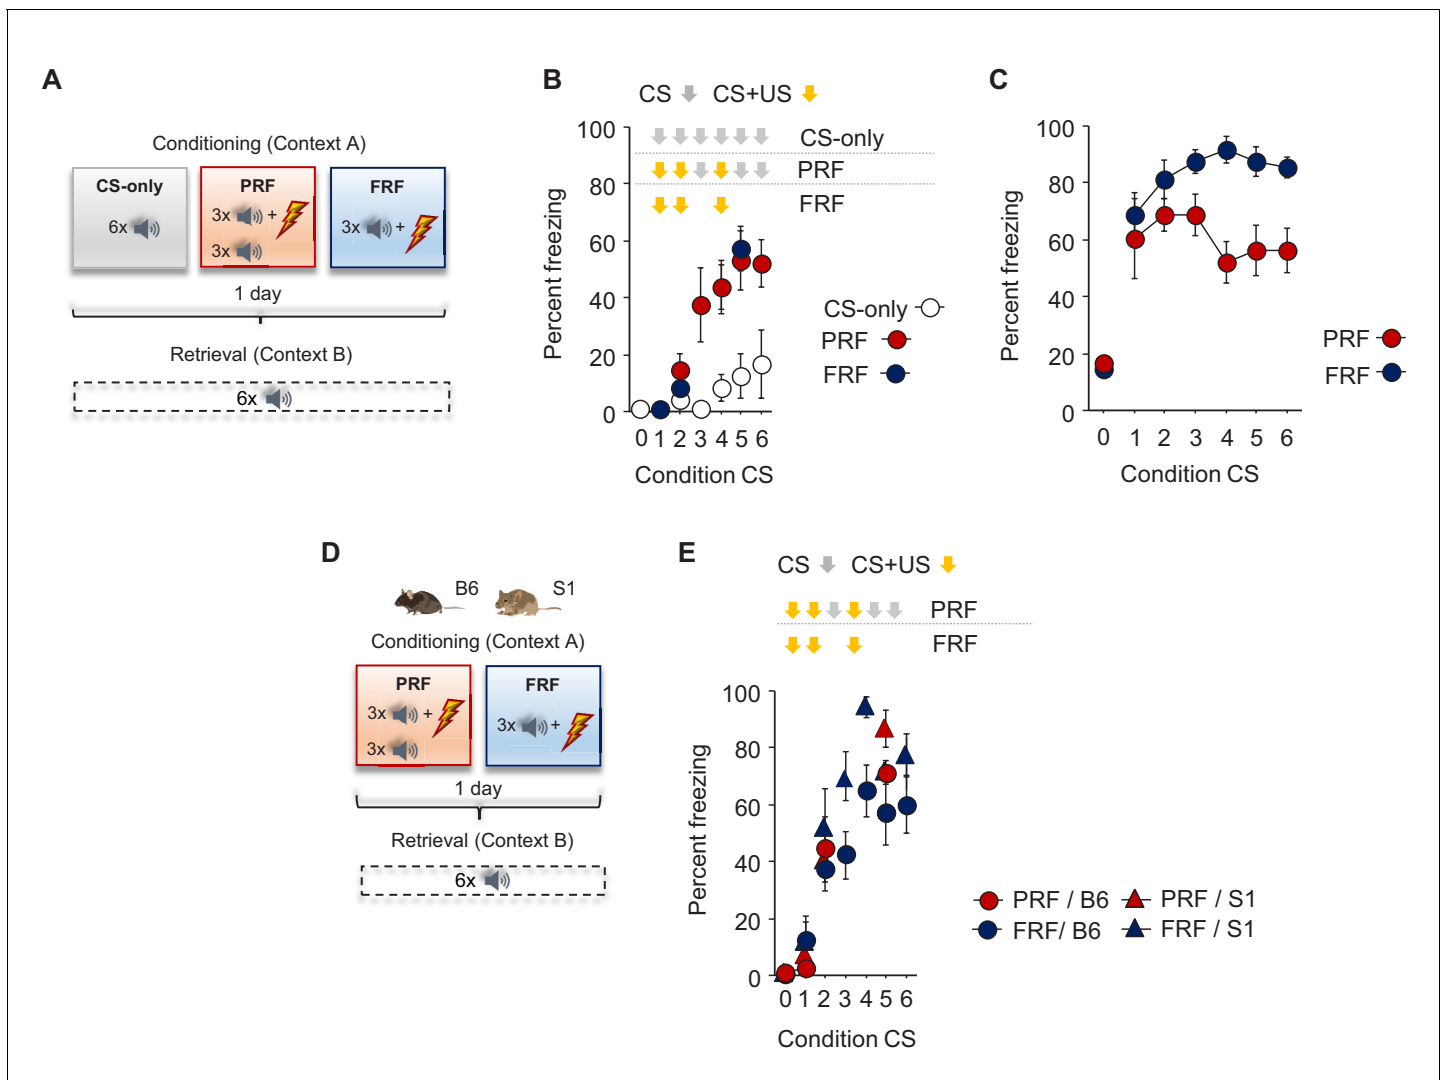

**Figure 1—figure supplement 1.** Freezing during conditioning. (A) Schematic depiction of experimental procedure for assessing, in B6 mice, PRF and FRF, along with CS-only controls. (B) No group differences in CS-related freezing during conditioning ( $n = 4-8$  mice per group). (C) No difference in CS-related freezing between FRF and PRF mice during retrieval, broken down by CS presentation ( $n = 8$  mice per group). (D) Schematic depiction of experimental procedure for assessing PRF and FRF retrieval in the B6 and S1 genetic strains. (E) No group differences in CS-related freezing during conditioning ( $n = 7-8$  mice per group/strain). Data are means  $\pm$  SEM.

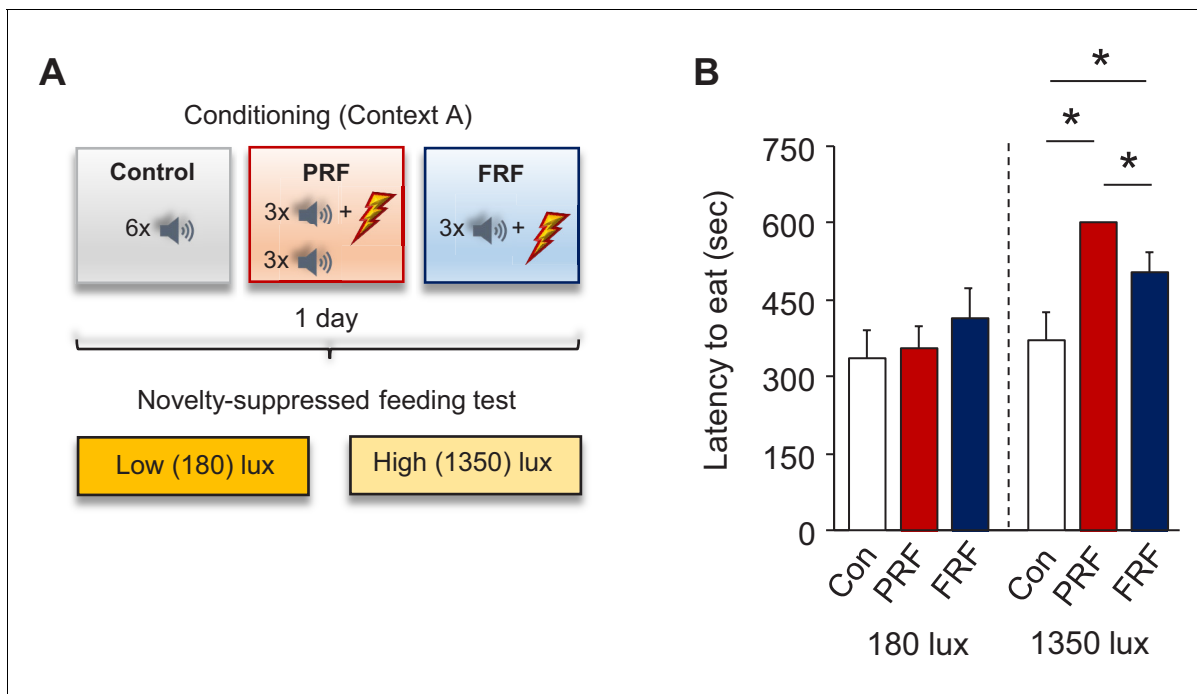

**Figure 1—figure supplement 2.** Increased latency to feed in the NSF test after PRF. **(A)** Schematic depiction of experimental procedure for assessing behavior on the novelty-suppressed feeding (NSF) test after PRF or FRF conditioning, along with context-exposed controls. **(B)** Longer latencies to eat under high, but not low, illumination in PRF and FRF versus controls and in PRF versus FRF.  $n = 8$  mice per group. Data are means  $\pm$  SEM.  $*p < 0.05$ .

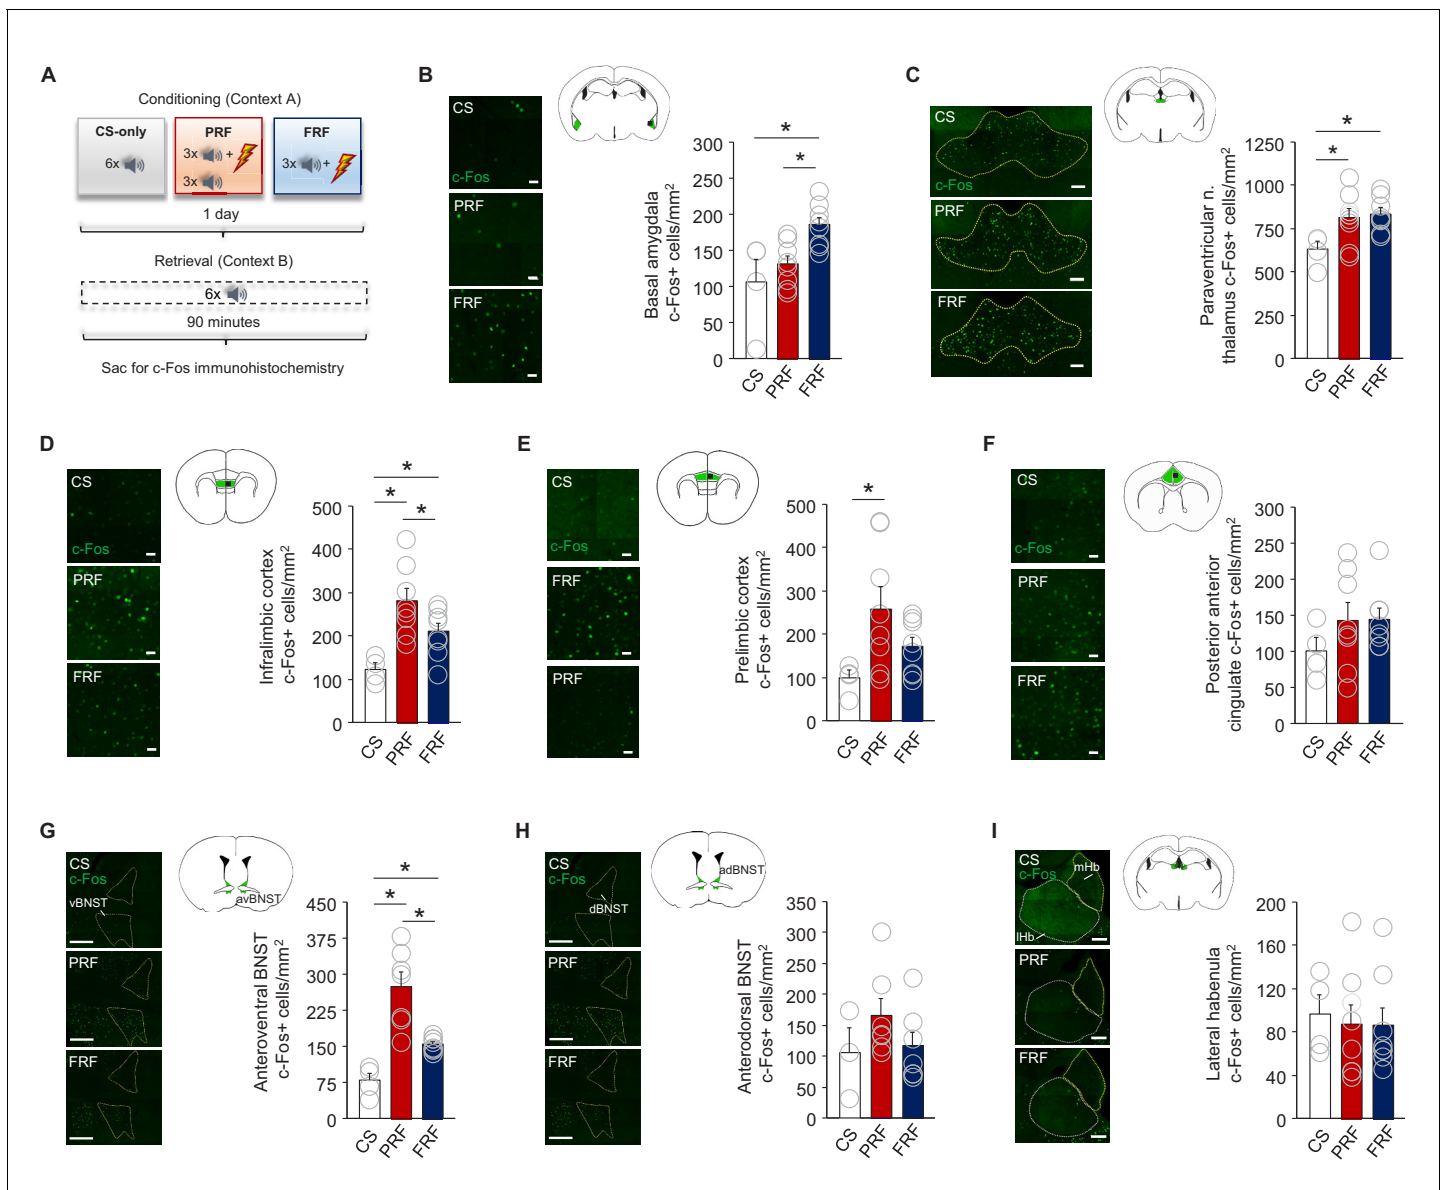

**Figure 2.** PRF preferentially activates subregions of mPFC and BNST. (A) Schematic depiction of experimental procedure for assessing ex vivo neuronal regional activity (via c-Fos immunohistochemistry) after PRF or FRF retrieval, along with CS-only controls. Representative images and c-Fos+ cell count differences for basal amygdala (B), paraventricular nucleus of the thalamus (C), infralimbic cortex (D), prelimbic cortex (E), posterior portion of the anterior cingulate cortex (F), anteroventral BNST (G), anterodorsal BNST (H), and lateral habenula (I). For corresponding behavioral data, see **Figure 1B**. Scale bars = 30  $\mu$ m (B,D–F), 100  $\mu$ m (C,I), 300  $\mu$ m (G,H).  $n = 4–8$  mice per group. Data are means  $\pm$  SEM. \* $p < 0.05$ .

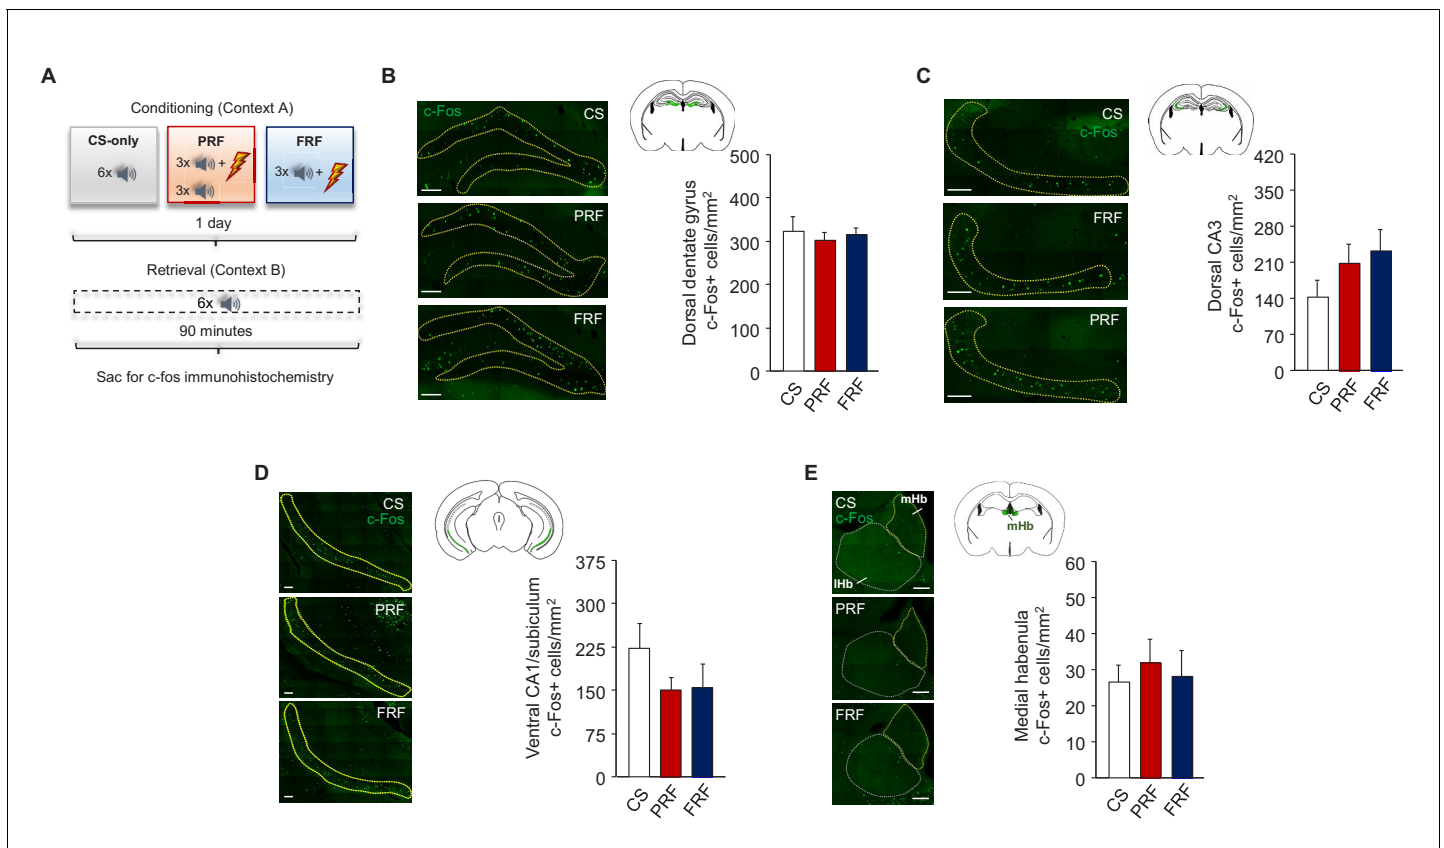

**Figure 2—figure supplement 1.** Ex vivo neuronal regional activity correlates of PRF. (A) Schematic depiction of experimental procedure for assessing ex vivo neuronal regional activity (via c-Fos immunohistochemistry) after PRF or FRF retrieval. Representative images and c-Fos+ cell counts for the dorsal dentate gyrus (B), dorsal CA3 (C), and ventral CA1/subiculum (D) regions of the hippocampus and the medial habenula (E). There were no group differences. Scale bars = 100  $\mu$ m. n = 4–8 mice per group. Data are means  $\pm$  SEM.

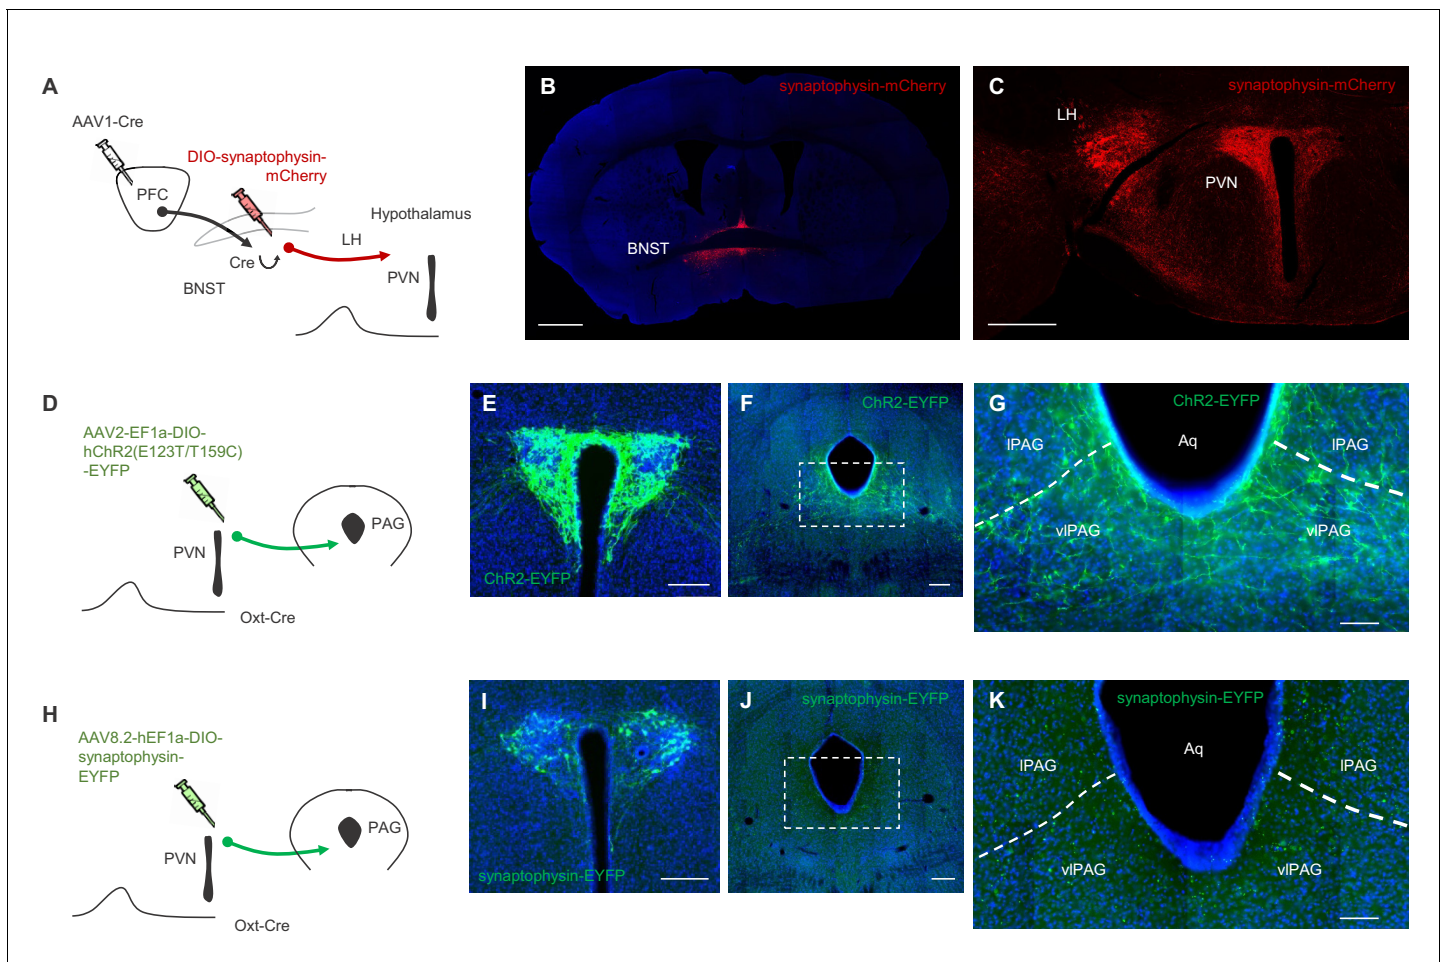

**Figure 2—figure supplement 2.** Connectivity between mPFC, BNST, and downstream targets. (A) Schematic depiction of viral strategy to label mPFC inputs to BNST neurons and their onward projections to the hypothalamus. (B) Representative image of synaptophysin-mCherry labeling in BNST neurons receiving mPFC input (scale bar = 1000  $\mu$ m). (C) Representative image of synaptophysin-mCherry labeling in mPFC-innervated BNST neuronal projections in hypothalamus (scale bar = 500  $\mu$ m). (D) Schematic depiction of viral strategy to label PVN oxytocin cell inputs to the PAG in Oxt-Cre mice. (E) Representative image of ChR2-EYFP labeling in the PVN (scale bar = 200  $\mu$ m). Low (F) and high (G) magnification images of ChR2-EYFP labeling in the PAG (scale bars = 200  $\mu$ m and 100  $\mu$ m, respectively). (H) Schematic depiction of viral strategy to label PVN oxytocin cell inputs to the PAG in Oxt-Cre mice. (I) Representative image of synaptophysin-EYFP labeling in the PVN (scale bar = 200  $\mu$ m). Low (J) and high (K) magnification images of synaptophysin-EYFP labeling in the PAG (scale bars = 200  $\mu$ m and 100  $\mu$ m, respectively). Note: LH = Lateral Hypothalamus; PVN = paraventricular nucleus of the hypothalamus; IPAG = lateral periaqueductal gray; vIPAG = ventrolateral periaqueductal gray; Aq = aqueduct.



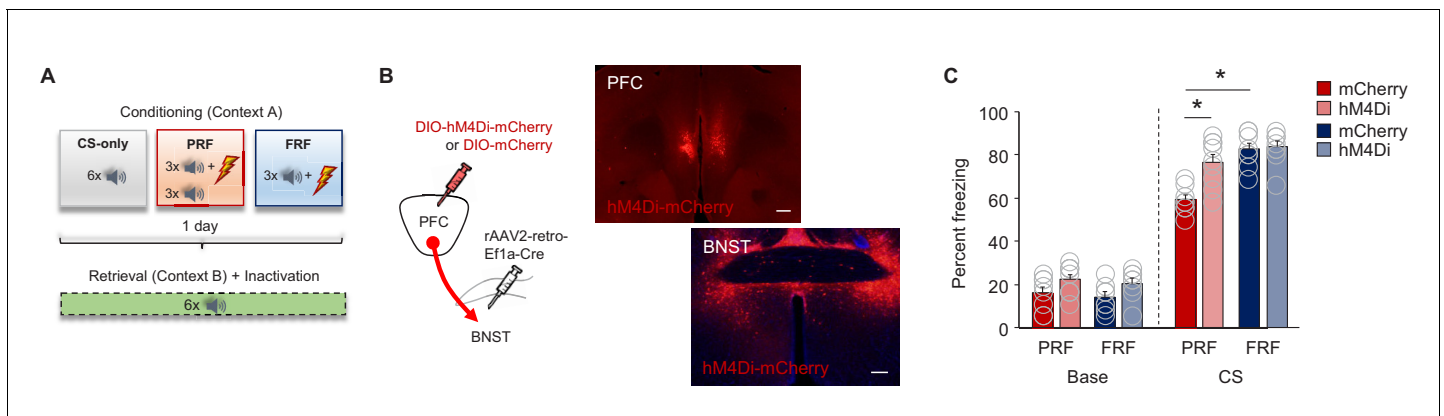

**Figure 3.** Inhibition of mPFC→BNST neurons increases PRF. **(A)** Schematic depiction of experimental procedure for assessing effects of chemogenetic inhibition of mPFC→BNST neurons during retrieval. **(B)** Cartoon of viral strategy and representative images of hM4Di-mCherry labeling in BNST neurons receiving mPFC input (scale bars = 200  $\mu$ m). **(C)** Lower CS-related freezing during retrieval in PRF mice than in FRF mice transfected with mCherry, not hM4Di. Data are means  $\pm$  SEM. \* $p < 0.05$ .

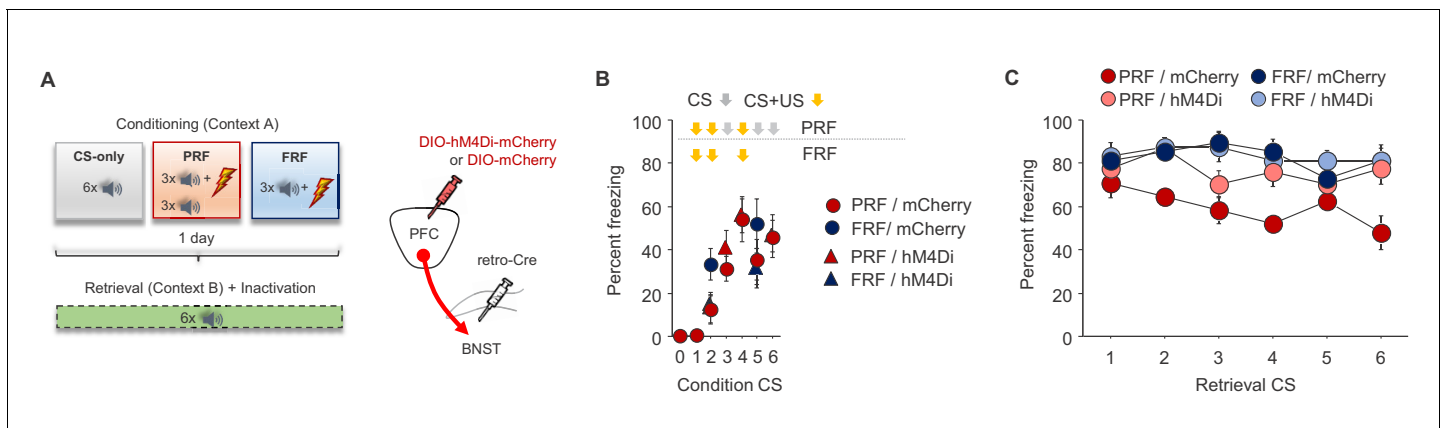

**Figure 3—figure supplement 1.** Freezing during conditioning prior to mPFC→BNST inhibition on retrieval. **(A)** Schematic depiction of viral strategy to selectively inhibit BNST-projecting mPFC neurons during retrieval. **(B)** Freezing increased across CS trials, irrespective of virus group. **(C)** Trial-by-trial breakdown of freezing during each CS of retrieval indicated a non-significant trend for decreasing freezing across trials in the mCherry PRF group.  $n = 8-9$  mice group/virus. Freezing data are means  $\pm$  SEM.

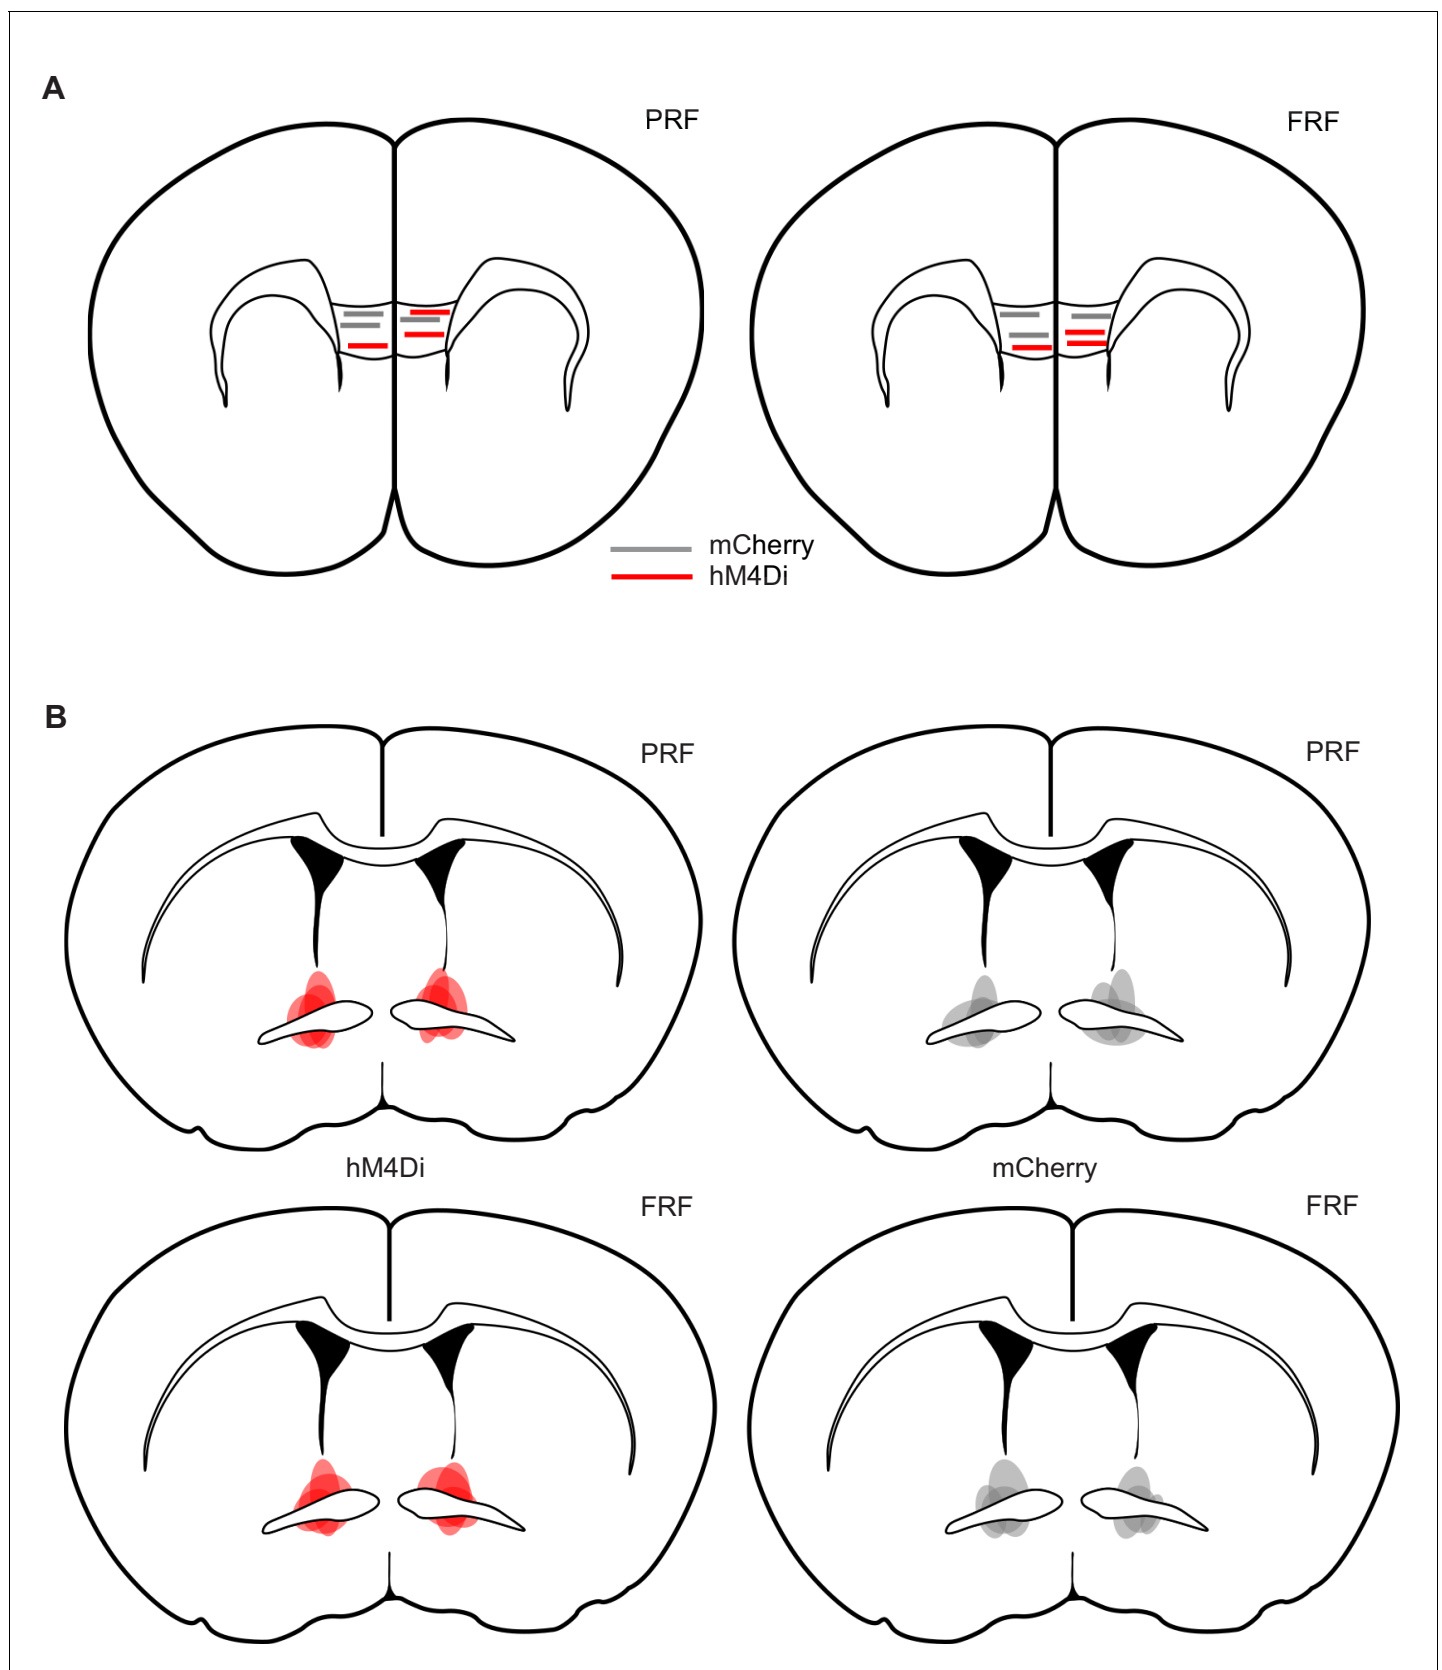

**Figure 3—figure supplement 2.** Electrode placements and virus localization for combined chemogenetic/single-unit recordings. Estimated location of tips of the electrodes at the center of the multi-array in the IL of PRF (A) and FRF (B) mice. Estimated extent of virus, as indicated by mCherry expression, in the BNST of PRF (C) and FRF (D) mice (darker shading represents areas of greater overlap across mice).

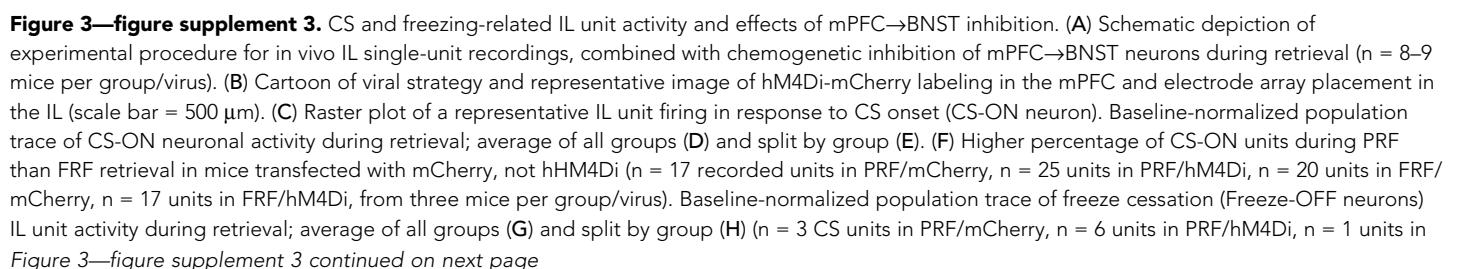

*Figure 3—figure supplement 3 continued*

FRF/mCherry,  $n = 1$  units in FRF/hM4Di). (I) Higher percentage of Freeze-OFF units during PRF than FRF retrieval in mice transfected with mCherry, not hM4Di ( $n = 17$  recorded units in PRF/mCherry,  $n = 25$  units in PRF/hM4Di,  $n = 20$  units in FRF/mCherry,  $n = 17$  units in FRF/hM4Di, from three mice per group/virus,  $n = 4$  Freeze-OFF units in PRF/mCherry,  $n = 6$  units in PRF/hM4Di,  $n = 3$  units in FRF/mCherry,  $n = 0$  units in FRF/hM4Di). Baseline-normalized population trace of freeze onset (Freeze-ON neurons) IL unit activity during retrieval; average of all groups (J) and split by group (K). (L) No differences in the percentage of Freeze-OFF units during retrieval between groups ( $n = 17$  units in PRF/mCherry,  $n = 25$  units in PRF/hM4Di,  $n = 20$  units in FRF/mCherry,  $n = 17$  units in FRF/hM4Di, from three mice per group/virus,  $n = 4$  Freeze-ON units in PRF/mCherry,  $n = 6$  units in PRF/hM4Di,  $n = 4$  units in FRF/mCherry,  $n = 2$  units in FRF/hM4Di). Data are means  $\pm$  SEM. \* $p < 0.05$ .

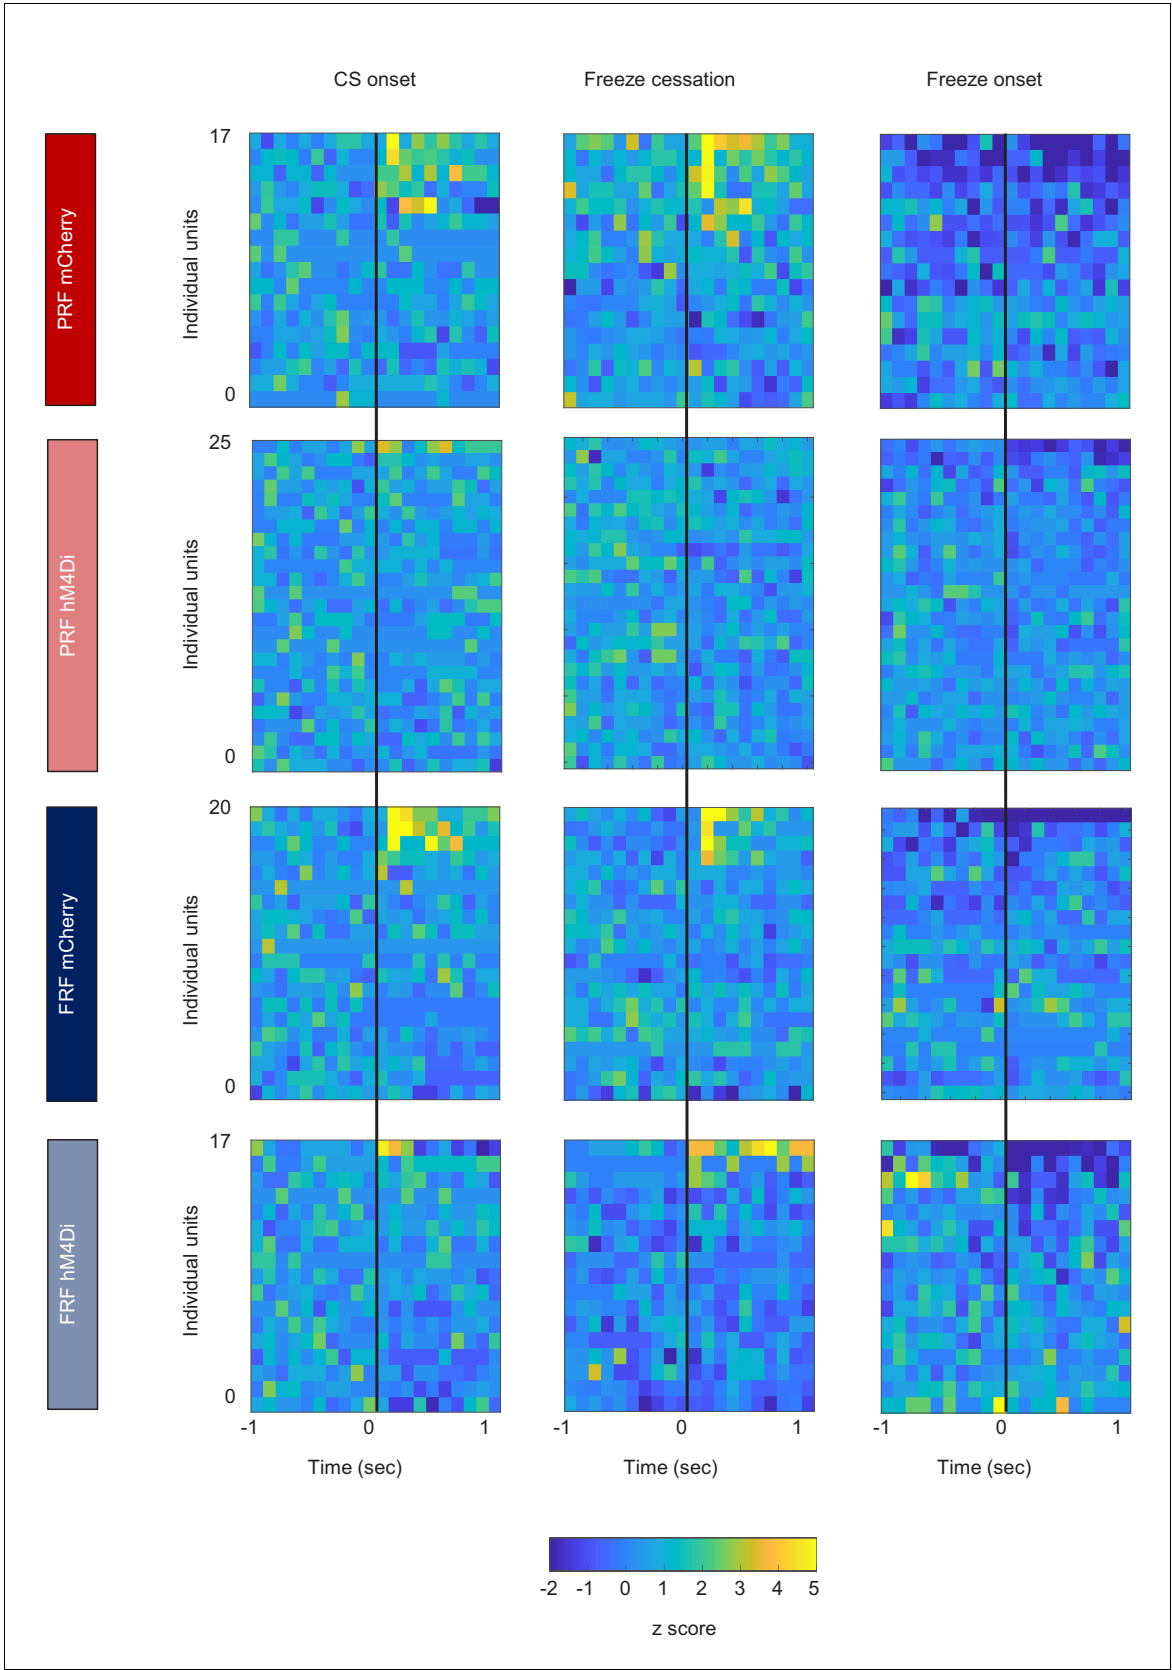

**Figure 3—figure supplement 4.** Heat maps illustrating IL unit activity. ( **A** ) Heat plots of unit activity aligned to CS onset (left columns), freeze cessation (center columns), and freeze onset (right columns). The same data shown as peri-event histograms and % event-related activity can be found in **Figure 3—figure supplement 3**.
